# Supplementary material for: Autonomous and self-sustained circadian oscillators displayed in human islet cells
Source: PubMed Central journal article supplement — Diabetologia. 2012 Dec 15;56(3):497–507. doi: 10.1007/s00125-012-2779-7 (PMC3563957; doi:10.1007/s00125-012-2779-7), 2012-12-15
Supplement: 125_2012_2779_MOESM5_ESM.pdf [file 125_2012_2779_MOESM5_ESM.pdf]

**Supplementary Table 1. Sequences of quantitative PCR primers**

| <i>Target gene</i> | <i>Sequence primers</i> |                                   |
|--------------------|-------------------------|-----------------------------------|
| <i>BMAL1</i>       | forward                 | 5'-ACGGTGGTGCTGGCTAGAGTGTA-3'     |
|                    | reverse                 | 5'-CTTCCAAAAACACAGTGCCCGGC-3'     |
| <i>REV-ERBa</i>    | forward                 | 5'-GATCGTGAGTCGCGGGGTCC-3'        |
|                    | reverse                 | 5'-TGTAGGTGATGACGCCACCTGTGT-3'    |
| <i>PER1</i>        | forward                 | 5'-CCCTTTGGTGACCCCAATG-3'         |
|                    | reverse                 | 5'-GCCCCATAAGGATAGCTGGAT-3'       |
| <i>PER2</i>        | forward                 | 5'-CGCAGGGTGCGCTCGTTTGAA-3'       |
|                    | reverse                 | 5'-GCTGGGCTCTGGAACGAAGCTTTCG-3'   |
| <i>PER3</i>        | forward                 | 5'-CCTGGACCCTGAACATGCA -3'        |
|                    | reverse                 | 5'-TGTGAGCCCCACGTGTTTAA-3'        |
| <i>CLOCK</i>       | forward                 | 5'-CCAGCCACCGCAACAATT -3'         |
|                    | reverse                 | 5'-GGATTCCCATGGAGCAACCTA-3'       |
| <i>DBP</i>         | forward                 | 5'-GATCGTGAGTCGCGGGGTCC-3'        |
|                    | reverse                 | 5'-GATCGTGAGTCGCGGGGTCC-3'        |
| <i>CRY1</i>        | forward                 | 5'-GAGAACAGATCCCAATGGAGACTATAT-3' |
|                    | reverse                 | 5'-CCTCTTAGGACAGGCAAATAACG-3'     |
| <i>CRY2</i>        | forward                 | 5'-ACTGCCCTGTGGGCTTTG-3'          |
|                    | reverse                 | 5'-TTTCAATTTGGGCAGGTATCG-3'       |
| <i>INSULIN</i>     | forward                 | 5'-GCAGCCTTTGTGAACCAACA-3'        |
|                    | reverse                 | 5'-CGTTCCCCGCACACTAGGTA-3'        |
| <i>HNF1A</i>       | forward                 | 5'-AGCGGGAGGTGGTCGATAC-3'         |
|                    | reverse                 | 5'-CATGGGAGTGCCCTTGTG-3'          |
| <i>PDX1</i>        | forward                 | 5'-CTGGATTGGCGTTGTTTGTG-3'        |
|                    | reverse                 | 5'-TCCCAAGGTGGAGTGCTGTAG-3'       |
| <i>GAPDH</i>       | forward                 | 5'-GAAGGTGAAGGTCGGAGTC-3'         |
|                    | reverse                 | 5'-GAAGATGGTGATGGGATTTTC-3'       |
| <i>9S</i>          | forward                 | 5'-CTCCGGAACAAACGTGAGGT-3'        |
|                    | reverse                 | 5'-TCCAGCTTCATCTTGCCCTC-3'        |
