# Supplementary figures and images for: Autonomous and self-sustained circadian oscillators displayed in human islet cells
Source: PubMed Central journal article supplement — Diabetologia. 2012 Dec 15;56(3):497–507. doi: 10.1007/s00125-012-2779-7 (PMC3563957; doi:10.1007/s00125-012-2779-7), 2012-12-15

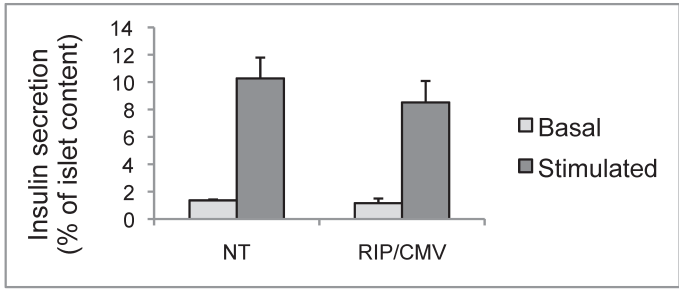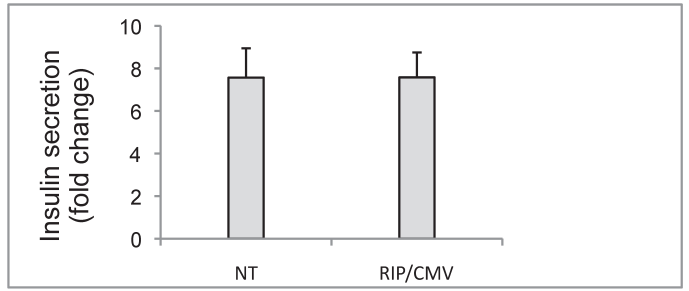

ESM Fig. 1

Supplement: 125_2012_2779_MOESM2_ESM.pdf [file 125_2012_2779_MOESM2_ESM.pdf]

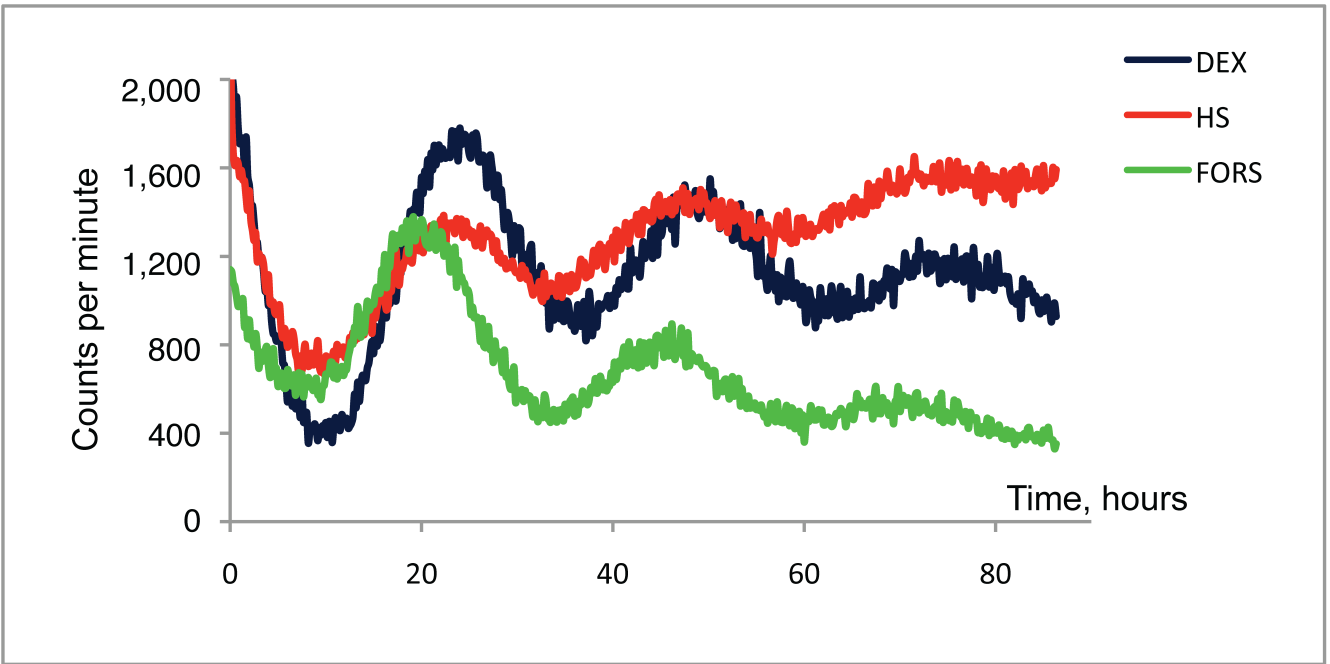

ESM Fig. 2

Supplement: 125_2012_2779_MOESM3_ESM.pdf [file 125_2012_2779_MOESM3_ESM.pdf]

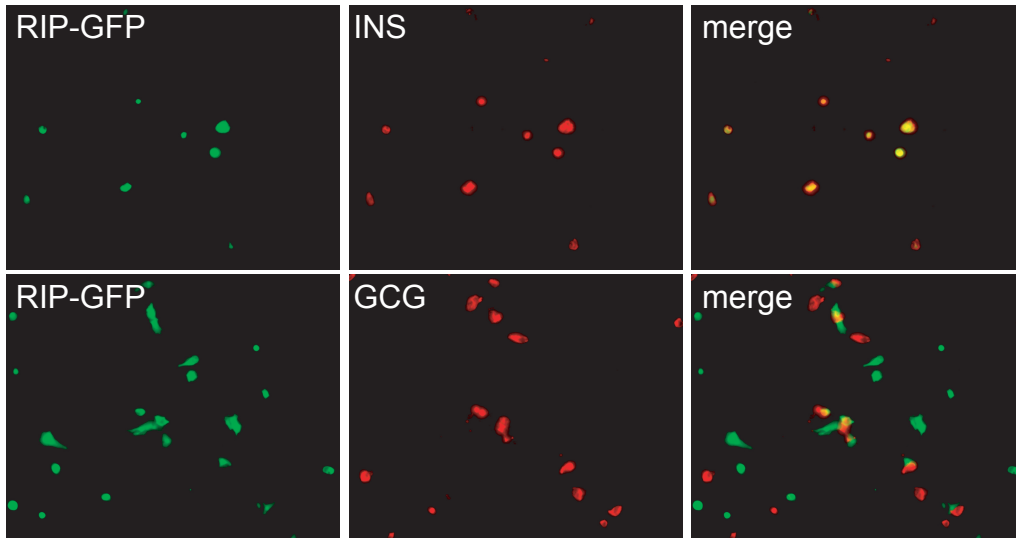

ESM Fig. 3

Supplement: 125_2012_2779_MOESM4_ESM.pdf [file 125_2012_2779_MOESM4_ESM.pdf]
